# Supplementary material for: Identification and analysis of novel recessive alleles for Tan1 and Tan2 in sorghum
Source: PeerJ. 2024 May 27;12:e17438. doi: 10.7717/peerj.17438 (PMC11138519; doi:10.7717/peerj.17438)
Supplement: Supplemental Information 1 [file peerj-12-17438-s001.xlsx]

## Sheet: Sheet1
Table S1. Primers used in this study.
Primer ID	Sequence	Size(bp)
Tan1-1F( Sbct3)	CACCAAGCTCCAGTTCAACC	723
Tan1-1R	ATTTCGGCACCTGCGTCGTA
Tan1-2F	ATTGATCCTGTGCTAGT	165
Tan1-2R	TAAATAAAAAGCATCAAACC
Tan1-F	TCACCTCTCTCGAGTCCCAGCA	1291
Tan1-R	CTCAGCAGAATGGCTGCTTCTG
Tan2-1F	CAGGTGCATGCATGAGTTC	977
Tan2-1R	CGTAGCATGGCAAACTGC
Tan2-2F	CATCATATAGCTGATGCAGC	669
Tan2-2R	GGAATAGAGGAAAGCCATG
Tan2-3F	CCAAACATAGTATCCTCC	671
Tan2-3R	ACAGTTAACGTACGGCTG
Tan2-4F	CAGCCGTACGTTAACTGT	779
Tan2-4R	CAGGTTTGTATGCACTGTTC
Tan2-5F	GTGTGTGGTCAATAGGATG	625
Tan2-5R	ACGAACTTGCATTGCTTCTG
Tan2-6F	CAGAAGCAATGCAAGTTCG	778
Tan2-6R	ATGGACCCAGGCTGTAGTA
InDel-1F	GTGTTTGCGCACTTGGC	223
InDel-1R	TGACCGGAGGTGAGATGA
InDel-2F	TACATCAGCTGGCATCGG	235
InDel-2R	TAACATGCACGTCGTCCC
InDel-3F	TTGGCTCCGTCCCATATT	181
InDel-3R	CTGcttcctctgtcccaaa
InDel-4F	GCCTCCAGGAAAGCTCAA	209
InDel-4R	AATTGAGCAGAGCCAGCC
InDel-5F	TACTGCGACTTGACGCCT	204
InDel-5R	CAATCAACCAACCAGCCA
InDel-6F	aacgaagccgttttgtcc	212
InDel-6R	ATGGGGCCCTTCTTATCC
InDel-7F	TGGTCGAATCGAAGAAAG	187
InDel-7R	GTTGTCGAACGAACCCAC
InDel-8F(CT17-F)	GTCAATGTGCCATACAGTAC	124
InDel-8R(CT17-R)	CACCTATATATGAGGTACGG
InDel-9F	ttttGACTTGGCCGCATA	180
InDel-9R	CTTGGAGAGCTTTGGCGT
InDel-10F	TACAAGCGCACCAAGGAC	250
InDel-10R	TCGACGAGAAGCTGAGGTC
