# Supplementary material for: Identification and analysis of novel recessive alleles for Tan1 and Tan2 in sorghum
Source: PeerJ. 2024 May 27;12:e17438. doi: 10.7717/peerj.17438 (PMC11138519; doi:10.7717/peerj.17438)
Supplement: Supplemental Information 2 [file peerj-12-17438-s002.xlsx]

## Sheet: Sheet1
Table S2. Summary of the sequencing data and mapping results.
Sample ID	Total reads	GC(%)	Q30(%)	Mapped reads (%)	Properly mapped (%)	Depth
8R191(non-tannin parent)	70987544	0.4471	0.9259	0.9823	0.9339	14
8R306(tannin parent)	72903748	0.4462	0.9212	0.9788	0.9189	14
non-tannin pool	290714470	0.4538	0.9263	0.9435	0.8921	54
tannin pool	280819698	0.4503	0.9227	0.9591	0.9069	53
