# Supplementary material for: Identification and analysis of novel recessive alleles for Tan1 and Tan2 in sorghum
Source: PeerJ. 2024 May 27;12:e17438. doi: 10.7717/peerj.17438 (PMC11138519; doi:10.7717/peerj.17438)
Supplement: Supplemental Information 3 [file peerj-12-17438-s003.xlsx]

## Sheet: Sheet1
Table S3. The annotation of candidate genes.
Gene name	Protein(aa)	Functional annotation
Sobic.004G280700	87	similar to Mitochondrial import inner membrane translocase subunit Tim13
Sobic.004G280800	353	WD repeat containing protein, transparent testa glabra 1, Tan1
Sobic.004G280900	179	Ring finger domain-containing protein
Sobic.004G281000	255	similar to MADS box protein
