# Supplementary material for: Identification and analysis of novel recessive alleles for Tan1 and Tan2 in sorghum
Source: PeerJ. 2024 May 27;12:e17438. doi: 10.7717/peerj.17438 (PMC11138519; doi:10.7717/peerj.17438)
Supplement: Supplemental Information 4 [file peerj-12-17438-s004.xlsx]

## Sheet: Sheet1
Table S4. Genotype and phenotype of the 396 accessions.
Accessions	Tan1	Tannin content (%)	Phenotype	Origin	Germplasm type		Phenotype	Origin and germplasm type	Accession number
217	tan1-a	0.002106	low-tannin	China	cultivar			China, landrace	23
R4	tan1-a	0.000945	low-tannin	China	cultivar			China, cultivar	16
R13	tan1-a	0.001073	low-tannin	China	cultivar		low-tannin	Foreign, landrace	115
R24	tan1-a	0.001808	low-tannin	China	cultivar			Foreign, cultivar	30
R25	tan1-a	0.001819	low-tannin	China	cultivar			NA, cultivar	2
R26	tan1-a	0.002095	low-tannin	China	cultivar			China, landrace	117
R28	tan1-a	0.003821	low-tannin	China	cultivar			China, cultivar	14
R43	tan1-a	0.0034	low-tannin	China	cultivar		high-tannin	Foreign, landrace	44
8R156	tan1-a	0.000945	low-tannin	India	landrace			Foreign, cultivar	16
8R169	tan1-a	0.001073	low-tannin	India	landrace			NA, cultivar	9
8R101	tan1-a	0.001808	low-tannin	India	landrace			NA, wild	10
8R134	tan1-a	0.001819	low-tannin	India	landrace		Total		396
8R154	tan1-a	0.002095	low-tannin	India	landrace
8R135	tan1-a	0.003821	low-tannin	India	landrace
8R165	tan1-a	0.0024	low-tannin	India	landrace
8R162	tan1-a	0.00351	low-tannin	India	landrace
8R151	tan1-a	0.00455	low-tannin	India	landrace
8R102	tan1-a	0.00432	low-tannin	India	landrace
8R168	tan1-a	0.00415	low-tannin	India	landrace
8R155	tan1-a	0.00418	low-tannin	India	landrace
8R583	tan1-a	0.00387	low-tannin	India	cultivar
8R159	tan1-a	0.00382	low-tannin	India	landrace
8R110	tan1-a	0.00391	low-tannin	India	landrace
8R076	tan1-a	0.00282	low-tannin	India	landrace
8R157	tan1-a	0.00287	low-tannin	India	landrace
8R265	tan1-a	0.00377	low-tannin	India	cultivar
8R158	tan1-a	0.00321	low-tannin	India	landrace
8R056	tan1-a	0.00435	low-tannin	Yemen	landrace
8R042	tan1-a	0.00427	low-tannin	Yemen	landrace
8R014	tan1-a	0.00365	low-tannin	Yemen	landrace
8R044	tan1-a	0.00367	low-tannin	Yemen	landrace
8R057	tan1-a	0.001212	low-tannin	Yemen	landrace
8R053	tan1-a	0.002415	low-tannin	Sudan	landrace
8R071	tan1-a	0.004	low-tannin	Sudan	landrace
8R223	tan1-a	0.002127	low-tannin	Cameroon	landrace
8R090	tan1-a	0.002287	low-tannin	Cameroon	landrace
8R094	tan1-a	0.00367	low-tannin	Cameroon	landrace
8R032	tan1-a	0.000754	low-tannin	Mali	landrace
8R031	tan1-a	0.000764	low-tannin	Mali	landrace
8R126	tan1-a	0.00419	low-tannin	Syria	landrace
8R077	tan1-a	0.001489	low-tannin	Ethiopia	landrace
8R010	tan1-b	0.00292	low-tannin	Ethiopia	landrace
8R185	tan1-b	0.00362	low-tannin	Thailand	landrace
8R147	tan1-a	0.00383	low-tannin	South Africa	landrace
8R170	tan1-a	0.001989	low-tannin	Uganda	landrace
8R236	tan1-a	0.001339	low-tannin	Somalia	landrace
8R037	tan1-a	0.00317	low-tannin	Morocco	landrace
8R115	tan1-a	0.00383	low-tannin	United States	landrace
173	tan1-b	0.001882	low-tannin	China	cultivar
171	tan1-b	0.002809	low-tannin	China	cultivar
172	tan1-b	0.003362	low-tannin	China	cultivar
R34	tan1-b	0.0012	low-tannin	China	cultivar
R44	tan1-b	0.0009	low-tannin	China	cultivar
8R103	tan1-b	0.00405	low-tannin	India	landrace
8R585	tan1-b	0.00446	low-tannin	India	cultivar
8R584	tan1-b	0.0046	low-tannin	India	cultivar
8R586	tan1-b	0.00472	low-tannin	India	cultivar
8R011	tan1-b	0.000754	low-tannin	Ethiopia	landrace
8R008	tan1-b	0.000945	low-tannin	Ethiopia	landrace
8R104	tan1-b	0.001222	low-tannin	Sudan	landrace
8R122	tan1-b	0.001393	low-tannin	Indonesia	landrace
8R321	tan1-b	0.002489	low-tannin	Mexico	cultivar
8R298	tan1-b	0.00387	low-tannin	United States	cultivar
8R267	tan1-b	0.00481	low-tannin	United States	cultivar
JS036	tan1-c	0.000874644	low-tannin	China	cultivar
8R314	tan1-c	0.004267	low-tannin	India	cultivar
JS051	tan1-c	0.00108581	low-tannin	India	cultivar
JS208	tan1-c	0.00110181	low-tannin	India	cultivar
JS213	tan1-c	0.00119144	low-tannin	India	cultivar
JS225	tan1-c	0.00115865	low-tannin	India	cultivar
8R109	tan1-c	0.001361	low-tannin	Zimbabwe	landrace
8R127	tan1-c	0.001563	low-tannin	Botswana	landrace
8R078	tan1-c	0.001616	low-tannin	Nicaragua	landrace
JS054	tan1-c	0.00114103	low-tannin	United States	cultivar
JS178	tan1-c	0.00104595	low-tannin	United States	cultivar
JS218	tan1-c	0.00157842	low-tannin	Thailand	cultivar
JS238	tan1-c	0.000872778	low-tannin	NA	cultivar
3197B	tan1-c	0.0001	low-tannin	United States	cultivar
8R336	tan1-d	0.00276	low-tannin	China	landrace
8R194	tan1-d	0.001073	low-tannin	Lesotho	landrace
8R191	tan1-d	0.001105	low-tannin	Lesotho	landrace
8R201	tan1-d	0.001339	low-tannin	Zimbabwe	landrace
8R193	tan1-d	0.00151	low-tannin	Lesotho	landrace
8R209	tan1-d	0.00167	low-tannin	Zimbabwe	landrace
8R187	tan1-d	0.002106	low-tannin	Swaziland	landrace
8R196	tan1-d	0.002181	low-tannin	Lesotho	landrace
8R022	tan1-d	0.00341	low-tannin	South Africa	landrace
8R137	tan1-e	0.00378	low-tannin	China	landrace
8R200	tan1-e	0.00282	low-tannin	China	landrace
8R374	Tan1	0.0025	low-tannin	China	landrace
8R353	Tan1	0.00337	low-tannin	China	landrace
8R297	Tan1	0.0042	low-tannin	China	cultivar
8R410	Tan1	0.00428	low-tannin	China	landrace
8R356	Tan1	0.00462275	low-tannin	China	landrace
8R622	Tan1	0.00447	low-tannin	China	landrace
8R350	Tan1	0.00328733	low-tannin	China	landrace
8R480	Tan1	0.00417775	low-tannin	China	landrace
8R418	Tan1	0.00473	low-tannin	China	landrace
8R402	Tan1	0.00475	low-tannin	China	landrace
8R394	Tan1	0.00484	low-tannin	China	landrace
8R613	Tan1	0.00486	low-tannin	China	landrace
8R457	Tan1	0.00489	low-tannin	China	landrace
JS120	Tan1	0.00130129	low-tannin	China	landrace
JS142	Tan1	0.00122432	low-tannin	China	landrace
JS245	Tan1	0.0009682	low-tannin	China	landrace
JS255	Tan1	0.00166697	low-tannin	China	landrace
JS257	Tan1	0.00174276	low-tannin	China	landrace
JS261	Tan1	0.00156964	low-tannin	China	landrace
JS266	Tan1	0.00238704	low-tannin	China	landrace
JS273	Tan1	0.00184647	low-tannin	China	landrace
212-1	Tan1	0.004091	low-tannin	China	cultivar
8R100	Tan1	0.00292	low-tannin	India	landrace
8R019	Tan1	0.00336	low-tannin	India	landrace
8R234	Tan1	0.003426	low-tannin	India	landrace
8R161	Tan1	0.00392	low-tannin	India	landrace
8R264	Tan1	0.00403	low-tannin	India	cultivar
8R263	Tan1	0.00448	low-tannin	India	cultivar
8R235	Tan1	0.00493	low-tannin	India	landrace
JS192	Tan1	0.000889664	low-tannin	India	cultivar
JS212	Tan1	0.00107962	low-tannin	India	cultivar
8R016	Tan1	0.000733	low-tannin	Tanzania	landrace
8R004	Tan1	0.00085	low-tannin	Somalia	landrace
8R063	Tan1	0.000882	low-tannin	Swaziland	landrace
8R085	Tan1	0.000935	low-tannin	South Africa	landrace
8R012	Tan1	0.000956	low-tannin	Ghana	landrace
8R045	Tan1	0.000967	low-tannin	Mali	landrace
8R051	Tan1	0.000977	low-tannin	South Africa	landrace
8R009	Tan1	0.001052	low-tannin	Ethiopia	landrace
8R093	Tan1	0.001073	low-tannin	Cameroon	landrace
8R111	Tan1	0.00118	low-tannin	Senegal	landrace
8R129	Tan1	0.001339	low-tannin	United States	landrace
8R034	Tan1	0.00135	low-tannin	Mali	landrace
8R108	Tan1	0.00135	low-tannin	Botswana	landrace
8R128	Tan1	0.001435	low-tannin	Botswana	landrace
8R059	Tan1	0.001563	low-tannin	Swaziland	landrace
8R195	Tan1	0.001584	low-tannin	Lesotho	landrace
8R096	Tan1	0.001936	low-tannin	Cameroon	landrace
8R125	Tan1	0.001978	low-tannin	Malawi	landrace
8R343	Tan1	0.00215	low-tannin	United States	cultivar
8R013	Tan1	0.00241	low-tannin	Mozambique	landrace
8R114	Tan1	0.002457	low-tannin	United States	landrace
8R208	Tan1	0.002553	low-tannin	Zimbabwe	landrace
8R559	Tan1	0.00263	low-tannin	Russia	cultivar
8R079	Tan1	0.00276	low-tannin	Cuba	landrace
8R116	Tan1	0.002777	low-tannin	United States	landrace
8R035	Tan1	0.0028	low-tannin	Mali	landrace
8R377	Tan1	0.00301	low-tannin	United States	cultivar
8R098	Tan1	0.00207445	low-tannin	Cameroon	landrace
8R017	Tan1	0.00313	low-tannin	Tanzania	landrace
8R018	Tan1	0.00313	low-tannin	Tanzania	landrace
8R143	Tan1	0.00155165	low-tannin	South Africa	landrace
8R054	Tan1	0.0034	low-tannin	BurkinaFaso	landrace
8R084	Tan1	0.00341	low-tannin	South Africa	landrace
8R175	Tan1	0.00341	low-tannin	Nigeria	landrace
8R376	Tan1	0.00343	low-tannin	United States	cultivar
8R140	Tan1	0.00171895	low-tannin	Nigeria	landrace
8R003	Tan1	0.00358	low-tannin	Somalia	landrace
8R033	Tan1	0.00361	low-tannin	Mali	landrace
8R047	Tan1	0.00238812	low-tannin	Benin	landrace
8R036	Tan1	0.0037	low-tannin	SierraLeone	landrace
8R179	Tan1	0.00379	low-tannin	Uganda	landrace
8R202	Tan1	0.003863	low-tannin	Zimbabwe	landrace
8R342	Tan1	0.00398	low-tannin	United States	cultivar
8R064	Tan1	0.00109159	low-tannin	Chad	landrace
8R227	Tan1	0.00425	low-tannin	Uganda	landrace
8R087	Tan1	0.00428	low-tannin	Argentina	landrace
8R387	Tan1	0.00429	low-tannin	Mexico	cultivar
8R171	Tan1	0.00429	low-tannin	Nigeria	landrace
8R112	Tan1	0.00444	low-tannin	Niger	landrace
8R067	Tan1	0.00454	low-tannin	Ethiopia	landrace
8R142	Tan1	0.00191761	low-tannin	South Africa	landrace
8R203	Tan1	0.00462	low-tannin	Zimbabwe	landrace
8R070	Tan1	0.00193852	low-tannin	Zimbabwe	landrace
8R173	Tan1	0.00169803	low-tannin	Nigeria	landrace
8R199	Tan1	0.0047	low-tannin	South Africa	landrace
8R172	Tan1	0.00473	low-tannin	Nigeria	landrace
8R174	Tan1	0.00482	low-tannin	Nigeria	landrace
8R198	Tan1	0.00145755	low-tannin	South Africa	landrace
8R072	Tan1	0.00497072	low-tannin	Australia	landrace
8R095	Tan1	0.00483	low-tannin	Cameroon	landrace
8R023	Tan1	0.00166667	low-tannin	South Africa	landrace
8R233	Tan1	0.00491	low-tannin	Yemen	landrace
JS189	Tan1	0.00123684	low-tannin	Mexico	cultivar
8R302	Tan1	0.0044	low-tannin	France	cultivar
8R388	Tan1	0.00196989	low-tannin	Mexico	cultivar
8R546	Tan1	0.00087	low-tannin	NA	cultivar
8R380	Tan1	0.01009	high-tannin	China	landrace
8R462	Tan1	0.01013	high-tannin	China	landrace
8R427	Tan1	0.01018	high-tannin	China	landrace
8R465	Tan1	0.01018	high-tannin	China	landrace
8R625	Tan1	0.01031	high-tannin	China	landrace
8R479	Tan1	0.01041	high-tannin	China	landrace
8R482	Tan1	0.01042	high-tannin	China	landrace
8R493	Tan1	0.01043	high-tannin	China	landrace
8R474	Tan1	0.01044	high-tannin	China	landrace
8R521	Tan1	0.01044	high-tannin	China	cultivar
8R401	Tan1	0.01045	high-tannin	China	landrace
8R614	Tan1	0.01049	high-tannin	China	landrace
8R483	Tan1	0.01052	high-tannin	China	landrace
8R501	Tan1	0.01052	high-tannin	China	cultivar
8R413	Tan1	0.0106	high-tannin	China	landrace
8R324	Tan1	0.01065	high-tannin	China	landrace
8R136	Tan1	0.0107	high-tannin	China	landrace
8R396	Tan1	0.01073	high-tannin	China	landrace
8R477	Tan1	0.01073	high-tannin	China	landrace
8R440	Tan1	0.01085	high-tannin	China	landrace
8R485	Tan1	0.01085	high-tannin	China	landrace
8R466	Tan1	0.01097	high-tannin	China	landrace
8R467	Tan1	0.01097	high-tannin	China	landrace
8R620	Tan1	0.01098	high-tannin	China	landrace
8R468	Tan1	0.01101	high-tannin	China	landrace
8R478	Tan1	0.01107	high-tannin	China	landrace
8R612	Tan1	0.01109	high-tannin	China	landrace
8R486	Tan1	0.0111	high-tannin	China	landrace
8R573	Tan1	0.01111	high-tannin	China	cultivar
8R541	Tan1	0.01116	high-tannin	China	cultivar
8R472	Tan1	0.01122	high-tannin	China	landrace
8R262	Tan1	0.01132	high-tannin	China	landrace
8R242	Tan1	0.011337	high-tannin	China	landrace
8R463	Tan1	0.01135	high-tannin	China	landrace
8R443	Tan1	0.01138	high-tannin	China	landrace
8R574	Tan1	0.01141	high-tannin	China	cultivar
8R281	Tan1	0.01142	high-tannin	China	landrace
8R426	Tan1	0.01152	high-tannin	China	landrace
8R491	Tan1	0.01154	high-tannin	China	landrace
8R352	Tan1	0.011561	high-tannin	China	landrace
8R277	Tan1	0.01164	high-tannin	China	landrace
8R492	Tan1	0.0117	high-tannin	China	landrace
8R476	Tan1	0.01171	high-tannin	China	landrace
8R481	Tan1	0.01171	high-tannin	China	cultivar
8R270	Tan1	0.01172	high-tannin	China	landrace
8R274	Tan1	0.01177	high-tannin	China	landrace
8R250	Tan1	0.01181	high-tannin	China	landrace
8R309	Tan1	0.01184	high-tannin	China	landrace
8R417	Tan1	0.01186	high-tannin	China	landrace
8R340	Tan1	0.01195	high-tannin	China	cultivar
8R345	Tan1	0.012029	high-tannin	China	landrace
8R572	Tan1	0.01206	high-tannin	China	cultivar
8R471	Tan1	0.01212	high-tannin	China	landrace
8R254	Tan1	0.01218	high-tannin	China	landrace
8R325	Tan1	0.01223	high-tannin	China	landrace
8R275	Tan1	0.01225	high-tannin	China	cultivar
8R334	Tan1	0.01226	high-tannin	China	landrace
8R326	Tan1	0.01229	high-tannin	China	landrace
8R358	Tan1	0.012359	high-tannin	China	landrace
8R212	Tan1	0.01245	high-tannin	China	landrace
8R304	Tan1	0.01253	high-tannin	China	landrace
8R299	Tan1	0.01258	high-tannin	China	landrace
8R310	Tan1	0.0126	high-tannin	China	landrace
8R469	Tan1	0.01265	high-tannin	China	landrace
8R406	Tan1	0.01271	high-tannin	China	landrace
8R333	Tan1	0.012828	high-tannin	China	landrace
8R313	Tan1	0.012839	high-tannin	China	landrace
8R361	Tan1	0.01286	high-tannin	China	cultivar
8R289	Tan1	0.013	high-tannin	China	landrace
8R271	Tan1	0.01302	high-tannin	China	landrace
8R276	Tan1	0.01302	high-tannin	China	landrace
8R451	Tan1	0.01306	high-tannin	China	landrace
8R449	Tan1	0.0131	high-tannin	China	landrace
8R323	Tan1	0.01312	high-tannin	China	landrace
8R576	Tan1	0.0132	high-tannin	China	cultivar
8R269	Tan1	0.01322	high-tannin	China	landrace
8R248	Tan1	0.01329	high-tannin	China	landrace
8R138	Tan1	0.01329	high-tannin	China	landrace
8R436	Tan1	0.01336	high-tannin	China	landrace
8R455	Tan1	0.01341	high-tannin	China	landrace
8R305	Tan1	0.01351	high-tannin	China	landrace
8R497	Tan1	0.01355	high-tannin	China	landrace
8R328	Tan1	0.01374	high-tannin	China	landrace
8R496	Tan1	0.01385	high-tannin	China	landrace
8R431	Tan1	0.014	high-tannin	China	cultivar
8R282	Tan1	0.01404	high-tannin	China	landrace
8R259	Tan1	0.01425	high-tannin	China	landrace
8R437	Tan1	0.01428	high-tannin	China	landrace
8R432	Tan1	0.01438	high-tannin	China	landrace
8R494	Tan1	0.0145	high-tannin	China	landrace
8R441	Tan1	0.01457	high-tannin	China	landrace
8R332	Tan1	0.01461	high-tannin	China	landrace
8R615	Tan1	0.01461	high-tannin	China	landrace
8R438	Tan1	0.01468	high-tannin	China	landrace
8R366	Tan1	0.014723	high-tannin	China	landrace
8R216	Tan1	0.01477	high-tannin	China	landrace
8R280	Tan1	0.0149	high-tannin	China	landrace
8R453	Tan1	0.0154935	high-tannin	China	landrace
8R287	Tan1	0.01501	high-tannin	China	landrace
8R286	Tan1	0.01504	high-tannin	China	landrace
8R331	Tan1	0.015064	high-tannin	China	landrace
8R213	Tan1	0.01507	high-tannin	China	landrace
8R283	Tan1	0.0152	high-tannin	China	landrace
8R327	Tan1	0.01528	high-tannin	China	landrace
8R255	Tan1	0.015309	high-tannin	China	landrace
8R253	Tan1	0.01535	high-tannin	China	landrace
8R210	Tan1	0.01535	high-tannin	China	landrace
8R244	Tan1	0.01537	high-tannin	China	landrace
8R285	Tan1	0.01538	high-tannin	China	landrace
8R308	Tan1	0.01553	high-tannin	China	landrace
8R272	Tan1	0.015713	high-tannin	China	landrace
8R288	Tan1	0.01591	high-tannin	China	landrace
8R278	Tan1	0.01596	high-tannin	China	landrace
8R312	Tan1	0.01598	high-tannin	China	landrace
8R337	Tan1	0.016	high-tannin	China	cultivar
8R273	Tan1	0.01603	high-tannin	China	landrace
8R247	Tan1	0.01629	high-tannin	China	landrace
8R215	Tan1	0.01635	high-tannin	China	landrace
8R279	Tan1	0.01646	high-tannin	China	landrace
8R311	Tan1	0.01646	high-tannin	China	landrace
8R214	Tan1	0.01647	high-tannin	China	landrace
8R306	Tan1	0.016565	high-tannin	China	landrace
8R256	Tan1	0.01662	high-tannin	China	landrace
8R246	Tan1	0.01671	high-tannin	China	landrace
8R446	Tan1	0.01693	high-tannin	China	landrace
8R243	Tan1	0.0172	high-tannin	China	landrace
8R284	Tan1	0.01761	high-tannin	China	landrace
8R249	Tan1	0.018876	high-tannin	China	landrace
8R245	Tan1	0.01927	high-tannin	China	landrace
hongyingzi	Tan1	0.0169	high-tannin	China	landrace
JS107	Tan1	0.0158745	high-tannin	China	cultivar
8R153	Tan1	0.01076	high-tannin	India	landrace
8R338	Tan1	0.01496	high-tannin	India	cultivar
8R579	Tan1	0.01022	high-tannin	United States	cultivar
8R517	Tan1	0.01026	high-tannin	United States	cultivar
8R131	Tan1	0.01033	high-tannin	United States	landrace
8R425	Tan1	0.01132	high-tannin	United States	cultivar
8R513	Tan1	0.01137	high-tannin	United States	cultivar
8R121	Tan1	0.01155	high-tannin	United States	landrace
8R344	Tan1	0.01177	high-tannin	United States	cultivar
8R341	Tan1	0.01181	high-tannin	United States	cultivar
8R514	Tan1	0.01192	high-tannin	United States	cultivar
8R133	Tan1	0.011463	high-tannin	United States	landrace
8R378	Tan1	0.016395	high-tannin	United States	cultivar
8R118	Tan1	0.012289	high-tannin	United States	landrace
8R002	Tan1	0.01012	high-tannin	Myanmar	landrace
8R218	Tan1	0.010134	high-tannin	Korea	landrace
8R204	Tan1	0.01018	high-tannin	Zimbabwe	landrace
8R319	Tan1	0.010507	high-tannin	West Germany	cultivar
8R225	Tan1	0.0106	high-tannin	Uganda	landrace
8R107	Tan1	0.01095	high-tannin	Botswana	landrace
8R205	Tan1	0.01097	high-tannin	Zimbabwe	landrace
8R189	Tan1	0.01129	high-tannin	Swaziland	landrace
8R144	Tan1	0.01139	high-tannin	South Africa	landrace
8R021	Tan1	0.01151	high-tannin	South Africa	landrace
8R038	Tan1	0.01189	high-tannin	South Africa	landrace
8R062	Tan1	0.01196	high-tannin	Swaziland	landrace
8R232	Tan1	0.01208	high-tannin	Yemen	landrace
8R184	Tan1	0.01216	high-tannin	Sudan	landrace
8R320	Tan1	0.01218	high-tannin	West Germany	cultivar
8R049	Tan1	0.01232	high-tannin	South Africa	landrace
8R329	Tan1	0.01242	high-tannin	Sweet Suangrass	cultivar
8R048	Tan1	0.01297	high-tannin	Madagascar	landrace
8R188	Tan1	0.0133	high-tannin	Swaziland	landrace
8R219	Tan1	0.013403	high-tannin	Korea	landrace
8R206	Tan1	0.01346	high-tannin	Zimbabwe	landrace
8R026	Tan1	0.0137	high-tannin	Zambia	landrace
8R182	Tan1	0.0137	high-tannin	Kenya	landrace
8R069	Tan1	0.0139	high-tannin	Ethiopia	landrace
8R068	Tan1	0.01413	high-tannin	Ethiopia	landrace
8R239	Tan1	0.01413	high-tannin	Kenya	landrace
8R230	Tan1	0.01486	high-tannin	Algeria	landrace
8R030	Tan1	0.01487	high-tannin	Rwanda	landrace
8R123	Tan1	0.0149	high-tannin	Kenya	landrace
8R145	Tan1	0.01493	high-tannin	Iran	landrace
8R316	Tan1	0.015032	high-tannin	Sumac	cultivar
8R317	Tan1	0.015106	high-tannin	West Germany	cultivar
8R222	Tan1	0.01516	high-tannin	Korea	landrace
8R050	Tan1	0.01526	high-tannin	South Africa	landrace
8R028	Tan1	0.01552	high-tannin	Ethiopia	landrace
8R106	Tan1	0.01564	high-tannin	Bangladesh	landrace
8R300	Tan1	0.016	high-tannin	Argentina	cultivar
8R183	Tan1	0.01613	high-tannin	Kenya	landrace
8R318	Tan1	0.016246	high-tannin	West Germany	cultivar
8R020	Tan1	0.01656	high-tannin	South Africa	landrace
8R006	Tan1	0.01667	high-tannin	Zambia	landrace
8R180	Tan1	0.01688	high-tannin	Uganda	landrace
8R228	Tan1	0.01732	high-tannin	Burundi	landrace
8R226	Tan1	0.01769	high-tannin	Uganda	landrace
8R181	Tan1	0.01808	high-tannin	Kenya	landrace
8R001	Tan1	0.01829	high-tannin	Sri Lanka	landrace
8R595	Tan1	0.01097	high-tannin	NA	cultivar
8R594	Tan1	0.0119222	high-tannin	NA	cultivar
8R597	Tan1	0.0127804	high-tannin	NA	cultivar
8R605	Tan1	0.01089	high-tannin	NA	cultivar
8R598	Tan1	0.01221	high-tannin	NA	cultivar
8R610	Tan1	0.01221	high-tannin	NA	cultivar
8R602	Tan1	0.01228	high-tannin	NA	cultivar
8R599	Tan1	0.0139	high-tannin	NA	cultivar
8R603	Tan1	0.01402	high-tannin	NA	cultivar
EU37	Tan1	0.01501	high-tannin	NA	wild
SV1-5	Tan1	0.015064	high-tannin	NA	wild
TU11	Tan1	0.01613	high-tannin	NA	wild
TU13	Tan1	0.0172	high-tannin	NA	wild
TU15	Tan1	0.01642	high-tannin	NA	wild
SL17	Tan1	0.01769	high-tannin	NA	wild
SL41	Tan1	0.01693	high-tannin	NA	wild
SL53	Tan1	0.01769	high-tannin	NA	wild
SL82	Tan1	0.01647	high-tannin	NA	wild
SL131	Tan1	0.015309	high-tannin	NA	wild
