# Supplementary material for: Identification and analysis of novel recessive alleles for Tan1 and Tan2 in sorghum
Source: PeerJ. 2024 May 27;12:e17438. doi: 10.7717/peerj.17438 (PMC11138519; doi:10.7717/peerj.17438)
Supplement: Supplemental Information 5 [file peerj-12-17438-s005.xlsx]

## Sheet: Sheet1
Table S5. Genotype and phenotype of the 72 accessions.
Accessions	Tan1	Tan2	Tannin content (%)	Phenotype	Origin	Germplasm type
8R374	Tan1	Tan2	0.0025	low-tannin	China	landrace
JS255	Tan1	Tan2	0.00166697	low-tannin	China	landrace
JS257	Tan1	Tan2	0.00174276	low-tannin	China	landrace
JS266	Tan1	Tan2	0.00238704	low-tannin	China	landrace
JS273	Tan1	Tan2	0.00184647	low-tannin	China	landrace
8R263	Tan1	Tan2	0.00448	low-tannin	India	cultivar
JS192	Tan1	Tan2	0.000889664	low-tannin	India	cultivar
8R387	Tan1	Tan2	0.00429	low-tannin	Mexico	cultivar
JS189	Tan1	Tan2	0.00123684	low-tannin	Mexico	cultivar
8R085	Tan1	Tan2	0.000935	low-tannin	South Africa	landrace
8R051	Tan1	Tan2	0.000977	low-tannin	South Africa	landrace
8R017	Tan1	Tan2	0.00313	low-tannin	Tanzania	landrace
8R018	Tan1	Tan2	0.00313	low-tannin	Tanzania	landrace
8R016	Tan1	Tan2	0.000733	low-tannin	Tanzania	landrace
8R063	Tan1	Tan2	0.000882	low-tannin	Swaziland	landrace
8R004	Tan1	Tan2	0.00085	low-tannin	Somalia	landrace
8R009	Tan1	Tan2	0.001052	low-tannin	Ethiopia	landrace
8R013	Tan1	Tan2	0.00241	low-tannin	Mozambique	landrace
8R079	Tan1	Tan2	0.00276	low-tannin	Cuba	landrace
8R093	Tan1	Tan2	0.001073	low-tannin	Cameroon	landrace
8R175	Tan1	Tan2	0.00341	low-tannin	Nigeria	landrace
8R234	Tan1	Tan2	0.003426	low-tannin	Guinea	landrace
8R129	Tan1	Tan2	0.001339	low-tannin	United States	landrace
8R546	Tan1	Tan2	0.00087	low-tannin	NA	cultivar
8R111	Tan1	tan2-a	0.00118	low-tannin	Senegal	landrace
8R035	Tan1	tan2-a	0.0028	low-tannin	Mali	landrace
8R096	Tan1	tan2-a	0.001936	low-tannin	Cameroon	landrace
8R012	Tan1	tan2-d	0.000956	low-tannin	Ghana	landrace
8R353	Tan1	tan2-e	0.00337	low-tannin	China	landrace
8R418	Tan1	tan2-e	0.00473	low-tannin	China	landrace
8R394	Tan1	tan2-e	0.00484	low-tannin	China	landrace
JS120	Tan1	tan2-e	0.00130129	low-tannin	China	landrace
JS142	Tan1	tan2-e	0.00122432	low-tannin	China	landrace
JS245	Tan1	tan2-e	0.0009682	low-tannin	China	landrace
8R302	Tan1	tan2-f	0.0044	low-tannin	France	cultivar
JS261	Tan1	tan2-g	0.00156964	low-tannin	China	landrace
JS212	Tan1	tan2-g	0.00107962	low-tannin	India	cultivar
8R388	Tan1	tan2-g	0.00196989	low-tannin	Mexico	cultivar
8R245	Tan1	Tan2	0.01927	high-tannin	China	landrace
8R249	Tan1	Tan2	0.018876	high-tannin	China	landrace
8R284	Tan1	Tan2	0.01761	high-tannin	China	landrace
8R243	Tan1	Tan2	0.0172	high-tannin	China	landrace
8R446	Tan1	Tan2	0.01693	high-tannin	China	landrace
8R312	Tan1	Tan2	0.01598	high-tannin	China	landrace
8R288	Tan1	Tan2	0.01591	high-tannin	China	landrace
8R469	Tan1	Tan2	0.01265	high-tannin	China	landrace
8R492	Tan1	Tan2	0.0117	high-tannin	China	landrace
8R479	Tan1	Tan2	0.01041	high-tannin	China	landrace
8R485	Tan1	Tan2	0.01085	high-tannin	China	landrace
8R270	Tan1	Tan2	0.01172	high-tannin	China	landrace
8R306	Tan1	Tan2	0.016565	high-tannin	China	landrace
8R243	Tan1	Tan2	0.0172	high-tannin	China	landrace
hongyingzi	Tan1	Tan2	0.0169	high-tannin	China	landrace
JS107	Tan1	Tan2	0.0158745	high-tannin	China	cultivar
8R001	Tan1	Tan2	0.01829	high-tannin	Sri Lanka	landrace
8R181	Tan1	Tan2	0.01808	high-tannin	Kenya	landrace
8R226	Tan1	Tan2	0.01769	high-tannin	Uganda	landrace
8R228	Tan1	Tan2	0.01732	high-tannin	Burundi	landrace
8R118	Tan1	Tan2	0.012289	high-tannin	United States	landrace
8R318	Tan1	Tan2	0.016246	high-tannin	West Germany	cultivar
8R317	Tan1	Tan2	0.015106	high-tannin	West Germany	cultivar
8R320	Tan1	Tan2	0.01218	high-tannin	West Germany	cultivar
EU37	Tan1	Tan2	0.01501	high-tannin	NA	wild
SV1-5	Tan1	Tan2	0.015064	high-tannin	NA	wild
TU11	Tan1	Tan2	0.01613	high-tannin	NA	wild
TU13	Tan1	Tan2	0.0172	high-tannin	NA	wild
TU15	Tan1	Tan2	0.01642	high-tannin	NA	wild
SL17	Tan1	Tan2	0.01769	high-tannin	NA	wild
SL41	Tan1	Tan2	0.01693	high-tannin	NA	wild
SL53	Tan1	Tan2	0.01769	high-tannin	NA	wild
SL82	Tan1	Tan2	0.01647	high-tannin	NA	wild
SL131	Tan1	Tan2	0.015309	high-tannin	NA	wild
