# Supplementary material for: Identification and analysis of novel recessive alleles for Tan1 and Tan2 in sorghum
Source: PeerJ. 2024 May 27;12:e17438. doi: 10.7717/peerj.17438 (PMC11138519; doi:10.7717/peerj.17438)
Supplement: Supplemental Information 8 — A, sterile line; R, restorer line. [file peerj-12-17438-s008.xlsx]

## Sheet: Sheet1
Table S6. Genotype of the 77 accessions(34 sterile lines and 43 restorer lines)
Sample	Tan1	Type			Tan1	tan1-a	tan1-b	tan1-c	tan1-d	tan1-e	Total
A1	Tan1	A		Sterile lines	17	8	9	0	0	0	34
A2	tan1-b	A		Restorer lines	33	8	2	0	0	0	43
A3	tan1-b	A
A4	tan1-a	A
A5	tan1-b	A
A9	tan1-a	A
A10	tan1-a	A
A11	tan1-a	A
A12	Tan1	A
A14	Tan1	A
A15	tan1-b	A
A16	Tan1	A
A17	Tan1	A
A18	tan1-a	A
A19	Tan1	A
A20	Tan1	A
A21	Tan1	A
A22	Tan1	A
A23	tan1-b	A
A24	Tan1	A
A25	tan1-b	A
A28	tan1-b	A
A29	Tan1	A
A30	Tan1	A
A31	Tan1	A
A32	Tan1	A
A33	Tan1	A
A34	tan1-a	A
A35	Tan1	A
A36	tan1-a	A
A37	Tan1	A
A38	tan1-a	A
A39	tan1-b	A
A40	tan1-b	A
R1	Tan1	R
R2	Tan1	R
R3	Tan1	R
R4	tan1-a	R
R5	Tan1	R
R6	Tan1	R
R7	Tan1	R
R8	Tan1	R
R9	Tan1	R
R10	Tan1	R
R11	tan1-a	R
R12	Tan1	R
R13	tan1-a	R
R14	Tan1	R
R15	Tan1	R
R16	Tan1	R
R17	Tan1	R
R18	Tan1	R
R19	Tan1	R
R20	Tan1	R
R21	Tan1	R
R23	Tan1	R
R24	tan1-a	R
R25	tan1-a	R
R26	tan1-a	R
R27	Tan1	R
R28	tan1-a	R
R29	Tan1	R
R30	Tan1	R
R31	Tan1	R
R32	Tan1	R
R33	Tan1	R
R34	tan1-b	R
R35	Tan1	R
R36	Tan1	R
R37	Tan1	R
R38	Tan1	R
R39	Tan1	R
R41	Tan1	R
R42	Tan1	R
R43	tan1-a	R
R44	tan1-b	R
R45	Tan1	R
Note: A, sterile line; R, restorer line.
